# Supplementary material for: Transcriptomic Analysis Reveals Selective Metabolic Adaptation of Streptococcus suis to Porcine Blood and Cerebrospinal Fluid
Source: Pathogens. 2017 Feb 15;6(1):7. doi: 10.3390/pathogens6010007 (PMC5371895; doi:10.3390/pathogens6010007)
Supplement: Supplementary file 1 [file pathogens-06-00007-s001.xlsx]

## Sheet: Index
Index
Supplementary Table S1	Bacterial strains and oligonucleotides used in this study.
Supplementary Table S2	Overview of significantly higher- and lower-expressed genes of the S. suis wild-type strain 10 in porcine blood as determined by Rockhopper analysis.
Supplementary Table S3	Overview of significantly higher- and lower-expressed genes of the S. suis wild-type strain 10 in porcine CSF as determined by Rockhopper analysis.
Supplementary Table S4	Validation of RNA-seq data by RT-qPCR.
Supplementary Table S5	Additional information on gene annotations and metabolite abbreviations used in Figure 1.
Supplementary Table S6	Amino acid concentrations (mg/dl) in porcine serum and CSF.
Supplementary Figure S1	Differentially expressed genes clustered in orthologous groups (COG).

## Sheet: Table S1
Supplementary Table S1.	Bacterial strains and oligonucleotides used in this study.
Strain	Description	Reference
S. suis strain 10	virulent serotype 2 strain, porcine isolate	Smith et al., 1999
Oligonucleotide	Sequence	Application
gyrB_for	GGACCTGGGTGCTTAACAGA	qRT-PCR
gyrB_rev	AGGTGGTACCCATGAGCAAG	qRT-PCR
glnQ5_qPCR_fw	CAAGGCTGCTTTACCGATTC	qRT-PCR
glnQ5_qPCR_rev	GGCTCAGATGACCAAGAAGG	qRT-PCR
fabH_qPCR_fw	CTCTGCCCTCCATTTGGATA	qRT-PCR
fabH_qPCR_rev	ATTTGGAGATGGTGCTGGAG	qRT-PCR
acnA_for	TCCGCCTCAATACCACCTAC	qRT-PCR
acnA_rev	GCCTCCAGCAACAGGAATTA	qRT-PCR
ilvH_qPCR_fw	TGGAGTGAGGTGCTACATCG	qRT-PCR
ilvH_qPCR_rev	TTGATTGATGTGGTCCGTGT	qRT-PCR
hom_qPCR_fw	TACACATGCCTTGGAAGCAG	qRT-PCR
hom_qPCR_rev	ACCAAGGTACGCAAGATTGG	qRT-PCR
purF_qPCR_fw	TGTCCGCTATGCAACTTCTG	qRT-PCR
purF_qPCR_rev	GCGAATCAAGTGCATGAGAA	qRT-PCR
glgB_qPCR_fw	GTGGCAACGCAGTCACTCTA	qRT-PCR
glgB_qPCR_rev	AGGCAGTGTCTGGACGAACT	qRT-PCR
SSU0182_qPCR_fw	AAAAGCGCGTGTTTATGAGG	qRT-PCR
SSU0182_qPCR_rev	CACTCGCAAGCAAGGTCATA	qRT-PCR
SSU1707_qPCR_fw	TTACCCAGGCAAATGGTGTT	qRT-PCR
SSU1707_qPCR_rev	CGGAAAAATCTACGCAGTCC	qRT-PCR
sly_for	GCTTTAAATGCGGCTTGAAC	qRT-PCR
sly_rev	AGCTTTTTGCAGAAGGGACA	qRT-PCR
MRP_for	ATTGCTCCACAAGAGGATGG	qRT-PCR
MRP_rev	AAGCGGTTTTACCTGCTTGA	qRT-PCR
argR_for	ACGGTCGCTACAATTTGAGG	qRT-PCR
argR_rev	TACTCGCTGGGAAAAACGAC	qRT-PCR
References
Smith,H.E., Veenbergen,V., van der Velde,J., Damman,M., Wisselink,H.J. and Smits,M.A. (1999). The cps genes of Streptococcus suis serotypes 1, 2, and 9: Development of rapid serotype-specific PCR assays. Journal of Clinical Microbiology, 37, 3146-3152.

## Sheet: Table S2
Supplementary Table S2. Overview of significantly higher and lower expressed genes of the S. suis wildtype strain 10 in porcine blood as determined by Rockhopper analysis.
Gene	locus tag	Gene product	COGs	Expression in THB	Expression in blood	qValue THB vs Blooda
	strain P1/7
-	SSU0027	phosphoribosylformylglycinamidine synthase protein	F	2	29	1.34619e-136
purF	SSU0028	amidophosphoribosyltransferase	F	1	24	6.00478e-109
purM	SSU0029	phosphoribosylaminoimidazole synthetase	F	3	31	3.10454e-38
purN	SSU0030	phosphoribosylglycinamide formyltransferase	F	2	53	5.21855e-141
purH	SSU0031	bifunctional phosphoribosylaminoimidazolecarboxamide formyltransferase/IMP cyclohydrolase	F	2	40	4.91944e-100
purD	SSU0032	phosphoribosylamine--glycine ligase	F	16	82	2.02919e-19
purE	SSU0033	phosphoribosylaminoimidazole carboxylase catalytic subunit	F	6	45	5.69588e-20
purK	SSU0034	phosphoribosylaminoimidazole carboxylase ATPase subunit	F	16	100	7.69394e-27
-	SSU0049	DNA-binding protein	NC	59	11	0.00162114
-	SSU0055	hypothetical protein	NC	24	3	1.76876e-05
-	SSU0064	hypothetical protein	S	495	1656	4.16004e-08
-	SSU0065	Holliday junction resolvase-like protein	L	1868	6823	1.05578e-05
-	SSU0066	hypothetical protein	S	95	423	1.09508e-16
rpsJ	SSU0069	30S ribosomal protein S10	J	520	87	6.27887e-05
adk	SSU0094	adenylate kinase	F	228	29	5.58288e-09
copY	SSU0116	negative regulator of copper transport operon	K	162	309	0.00310073
-	SSU0117	hypothetical protein	NC	11	43	0.000477559
copZ	SSU0118	copper chaperone CopZ	P	5	38	3.66697e-12
-	SSU0124	hypothetical protein	S	23	121	5.22486e-13
groES	SSU0146	co-chaperonin GroES	O	321	50	3.26483e-06
groEL	SSU0147	molecular chaperone GroEL	O	290	52	0.000322961
glnR	SSU0156	MerR family transcriptional regulator	K	547	50	9.86215e-20
glnA	SSU0157	glutamine synthetase	E	221	26	2.48368e-09
-	SSU0159	hypothetical protein	S	230	417	0.00499264
-	SSU0162	DNA-binding/iron metalloprotein/AP endonuclease	O	53	10	0.00143933
-	SSU0163	AraC family transcriptional regulator	K	55	121	0.000202837
-	SSU0164	extracellular solute-binding lipoprotein	G	6	557	0
-	SSU0165	binding-protein-dependent transport system membrane protein	G	1	124	0
-	SSU0166	ABC transporter permease	G	3	274	0
-	SSU0167	alpha-galactosidase	G	3	206	0
-	SSU0173	membrane protein	NC	5	153	0
-	SSU0174	ABC transporter ATP-binding protein	V	3	111	0
-	SSU0176	beta-glucosidase	G	1	131	0
-	SSU0178	PTS multi-domain regulator	K	0	44	0
-	SSU0179	sugar phosphotransferase system (PTS), lactose/cellobiose-specific family, IIB subunit protein	G	2	98	0
ulaA	SSU0180	PTS system ascorbate-specific transporter subunit IIC	S	3	103	0
-	SSU0181	transketolase subunit	G	1	49	0
-	SSU0182	transketolase subunit	G	2	83	0
agaS	SSU0185	tagatose-6-phosphate aldose/ketose isomerase	M	13	45	1.33509e-06
pfl	SSU0191	formate acetyltransferase	C	129	1659	3.20781e-99
dinB	SSU0192	DNA polymerase IV	L	96	1450	0
-	SSU0194	hypothetical protein	R	38	310	1.32195e-64
-	SSU0195	tagatose-6-phosphate kinase	G	44	385	3.76596e-93
-	SSU0196	HhH-GPD superfamily base excision DNA repair protein	L	138	666	8.94511e-24
-	SSU0197	hypothetical protein	NC	209	558	8.25187e-05
-	SSU0199	sugar phosphotransferase system (PTS), IIC component	G	1	338	0
-	SSU0200	hypothetical protein	NC	0	367	0
-	SSU0201	surface-anchored protein	NC	2	244	0
-	SSU0203	binding-protein-dependent transport system protein	P	8	34	4.74731e-07
-	SSU0204	ABC transporter ATP-binding protein	P	1	67	0
-	SSU0205	extracellular solute binding protein	P	40	81	0.00132601
-	SSU0217	sugar phosphotransferase system (PTS), IIABC component	G	276	41	0.00158475
-	SSU0227	membrane protein	S	8	44	2.11855e-19
-	SSU0228	membrane protein	S	7	48	7.42349e-30
-	SSU0229	ABC transporter ATP-binding protein	V	13	88	4.95128e-21
-	SSU0230	sodium:alanine symporter family protein	E	53	7	1.53621e-07
-	SSU0236	membrane protein	M	23	107	7.38607e-18
-	SSU0237	haloacid dehalogenase	R	7	49	7.57395e-18
-	SSU0238	membrane protein	R	16	68	3.96639e-10
-	SSU0240	ABC transporter ATP-binding protein	R	31	106	5.03553e-09
-	SSU0243	hypothetical protein	NC	96	1104	3.72473e-191
-	SSU0244	membrane protein	S	69	558	2.32006e-82
-	SSU0245	PadR family transcriptional regulator	K	51	430	3.84834e-57
gla	SSU0249	glycerol facilitator-aquaporin	G	70	13	0.000941282
-	SSU0263	ABC transporter ATP-binding protein	C	38	79	0.000656723
-	SSU0282	hypothetical protein	H	13	35	0.00141971
-	SSU0283	amidase	J	42	100	5.69329e-05
-	SSU0284	extracellular solute-binding protein	E	40	88	0.000899275
-	SSU0288	cation-transporting ATPase	P	183	10	2.41482e-66
-	SSU0293	hypothetical protein	S	48	91	0.00888161
recG	SSU0314	ATP-dependent DNA helicase	L	16	46	2.85336e-06
-	SSU0318	universal stress protein	T	29	1254	0
-	SSU0327	deoxyguanosinetriphosphate triphosphohydrolase	F	7	26	1.99724e-06
galR	SSU0328	galactose operon repressor	K	107	2637	0
galK	SSU0329	galactokinase	G	5	659	0
galT	SSU0330	galactose-1-phosphate uridylyltransferase	G	10	1455	0
nadD	SSU0337	nicotinic acid mononucleotide adenylyltransferase	H	109	286	2.24539e-06
-	SSU0342	hypothetical protein	S	110	227	0.00128751
-	SSU0345	hypothetical protein	R	19	51	0.000135165
-	SSU0347	hypothetical protein	NC	5	31	1.63433e-23
-	SSU0348	hypothetical protein	R	18	153	2.32688e-83
-	SSU0349	hypothetical protein	NC	31	227	6.53206e-44
-	SSU0350	hypothetical protein	NC	21	140	1.47712e-23
fms	SSU0351	peptide deformylase	J	54	414	3.15049e-54
clpL	SSU0352	ATP-dependent protease ATP-binding subunit ClpL	O	13	37	5.34573e-06
-	SSU0356	endonuclease/exonuclease/phosphatase family protein	R	43	7	0.000124182
-	SSU0363	hypothetical protein	NC	7	51	1.84586e-22
-	SSU0382	ribosomal RNA small subunit methyltransferase	J	81	161	0.00146514
-	SSU0383	protein phosphatase	T	91	162	0.00652864
cysM	SSU0391	cysteine synthase	E	316	34	9.73842e-12
-	SSU0395	sigma 54 modulation protein / S30EA ribosomal protein	J	143	3094	0
-	SSU0400	GntR family transcriptional regulator	K	56	133	9.03091e-05
-	SSU0401	GntR family transcriptional regulator	K	38	96	7.00927e-05
-	SSU0402	beta-galactosidase precursor	G	2	95	0
-	SSU0404	sugar phosphotransferase system (PTS), sorbose-specific family, IIC component	G	0	130	0
-	SSU0405	sugar phosphotransferase system (PTS), mannose/fructose/sorbose family, IID component	G	2	125	0
-	SSU0406	sugar phosphotransferase system (PTS), fructose family, IIA component	G	20	742	0
-	SSU0407	aldose 1-epimerase	G	14	317	0
-	SSU0408	hypothetical protein	NC	407	18	1.92835e-93
-	SSU0409	hypothetical protein	NC	155	27	0.000186997
-	SSU0416	DEAD/DEAH box family helicase	S	7	23	3.45431e-06
-	SSU0442	hypothetical protein	NC	137	407	6.02543e-08
glnQ3	SSU0447	glutamine transporter, ATP-binding protein 3	E	25	55	0.00384439
-	SSU0457	peptidase	O	83	8	1.89544e-14
-	SSU0458	peptidase	O	400	39	8.06161e-11
-	SSU0460	hypothetical protein	NC	259	55	0.00599131
-	SSU0461	hypothetical protein	S	19	57	0.00351052
-	SSU0462	BioY family protein	R	88	6	1.10112e-29
-	SSU0480	RNA polymerase sigma factor protein	K	4	24	1.33075e-10
-	SSU0490	membrane protein	NC	18	40	0.0074147
-	SSU0491	ABC transporter ATP-binding protein	V	41	205	5.3136e-22
-	SSU0492	GntR family transcriptional regulator	K	17	113	4.99157e-19
dnaE	SSU0493	DNA polymerase III DnaE	L	49	166	6.92639e-07
-	SSU0503	amino acid ABC transporter permease/substrate-binding protein	E	155	358	0.000900729
-	SSU0506	metallo-beta-lactamase superfamily protein	R	38	83	0.00176019
-	SSU0541	transposase	L	67	143	0.00248258
-	SSU0542	transposase	L	95	265	3.24434e-07
-	SSU0566	transposase	L	54	151	4.00301e-05
-	SSU0567	transposase	L	93	240	3.73894e-06
-	SSU0571	hypothetical protein	NC	37	139	2.19681e-06
-	SSU0572	plasmid addiction system, toxin protein	J	48	232	4.48973e-14
-	SSU0573	multi antimicrobial extrusion (MATE) family transporter	V	28	57	0.00276205
-	SSU0576	hypothetical protein	S	53	128	2.45356e-05
-	SSU0577	hypothetical protein	S	33	71	0.00194166
arcA	SSU0580	arginine deiminase	E	44	3272	0
-	SSU0581	acetyltransferase (GNAT) family protein	R	21	1864	0
arcB	SSU0582	ornithine carbamoyltransferase	E	14	2376	0
arcC	SSU0583	carbamate kinase	E	5	1996	0
-	SSU0584	C4-dicarboxylate anaerobic carrier protein	S	2	811	0
-	SSU0585	hypothetical protein	E	71	447	7.9728e-44
-	SSU0594	hypothetical protein	NC	40	2	2.17628e-26
-	SSU0613	hypothetical protein	K	60	202	6.30167e-10
serC	SSU0621	phosphoserine aminotransferase	H	9	25	0.00231657
-	SSU0622	acetyltransferase (GNAT) family protein	NC	20	53	0.001362
-	SSU0626	cation efflux family protein	P	2	121	0
-	SSU0642	type III restriction-modification system, restriction enzyme	V	9	27	5.37514e-07
dpfB	SSU0647	phosphopantothenate--cysteine ligase	H	42	4	3.0313e-15
-	SSU0649	membrane protein	S	33	5	4.99345e-05
-	SSU0653	type I restriction-modification system, specificity protein	V	38	65	0.00820305
-	SSU0655	hypothetical protein	NC	4	44	1.17599e-54
gldA	SSU0670	glycerol dehydrogenase	C	1	36	0
glpO	SSU0676	alpha-glycerophosphate oxidase	C	0	146	0
nox	SSU0682	NADH oxidase	R	106	340	1.64792e-06
-	SSU0688	Crp family regulatory protein	T	5	23	7.72384e-08
-	SSU0689	uridine phosphorylase	F	8	28	0.000330311
-	SSU0692	ABC transporter ATP-binding protein	P	18	72	8.22882e-10
-	SSU0700	membrane protein	NC	30	89	1.64868e-08
-	SSU0701	ABC transporter ATP-binding protein	V	24	92	7.93972e-10
-	SSU0709	glycerol-3-phosphate acyltransferase PlsY	S	74	9	1.84089e-08
-	SSU0718	hypothetical protein	NC	40	7	0.000330311
-	SSU0741	hypothetical protein	NC	29	6	0.0065001
-	SSU0758	carbohydrate kinase	G	27	131	2.43516e-18
-	SSU0760	guanosine 5'-monophosphate oxidoreductase	F	33	3	5.83955e-20
-	SSU0766	DeoR family transcriptional regulator	K	59	112	0.00315061
fruK	SSU0767	1-phosphofructokinase	G	72	281	5.85674e-15
fruA	SSU0768	fructose-specific phosphotransferase system (PTS), IIABC component	G	65	320	1.83509e-19
glkA	SSU0775	glucokinase	K	68	134	0.00181252
-	SSU0802	restriction enzyme	V	18	44	0.000199597
-	SSU0803	5-methylcytosine-specific restriction enzyme subunit McrC	V	11	29	0.00136052
-	SSU0826	phosphoglucomutase/phosphomannomutase family protein	G	41	96	0.000131962
-	SSU0838	hypothetical protein	I	11	29	0.001347
-	SSU0844	haloacid dehalogenase	R	15	66	1.22308e-10
rplL	SSU0845	50S ribosomal protein L7/L12	J	1058	190	0.00974051
-	SSU0853	hypothetical protein	NC	50	6	4.10509e-10
-	SSU0854	hemolysin-III-like membrane protein	R	83	9	7.05866e-12
sntC	SSU0860	5'-nucleotidase	F	55	545	2.20193e-114
pyrC	SSU0861	dihydroorotase	F	51	167	9.47613e-10
ung	SSU0862	uracil-DNA glycosylase	L	40	153	1.42663e-11
-	SSU0863	glycosyl transferase	M	18	39	0.00601624
pyrE	SSU0864	orotate phosphoribosyltransferase	F	25	155	4.84257e-26
pyrF	SSU0866	orotidine 5'-phosphate decarboxylase	F	15	59	3.51669e-08
glgC	SSU0870	glucose-1-phosphate adenylyltransferase	G	30	812	0
glgA	SSU0873	glycogen synthase	G	32	976	0
glgB	SSU0874	1,4-alpha-glucan branching enzyme	G	18	674	0
-	SSU0875	extracellular amino acid-binding protein	E	25	54	0.00432439
uvrB	SSU0882	excinuclease ABC subunit B	L	42	79	0.00358582
-	SSU0883	glutamine ABC transporter, glutamine-binding protein/permease protein	E	129	10	1.91646e-24
glnQ1	SSU0884	glutamine ABC transporter ATP-binding protein 1	E	461	52	1.38571e-09
-	SSU0886	ABC transporter ATP-binding protein	R	8	55	2.03082e-31
cysD	SSU0887	O-acetylhomoserine (thiol)-lyase	E	11	57	8.46456e-17
rex	SSU0922	redox-sensing transcriptional repressor Rex	R	65	118	0.00663663
ldh	SSU0927	L-lactate dehydrogenase	C	589	62	3.95153e-08
-	SSU0930	ABC transporter permease	R	39	126	1.1309e-08
-	SSU0931	ABC transporter permease	R	29	97	1.95323e-08
-	SSU0932	ABC transporter ATP-binding protein	R	86	287	6.22623e-08
-	SSU0934	lipoprotein	R	184	611	4.7678e-07
cdd	SSU0935	cytidine deaminase	F	139	390	3.57442e-07
deoC	SSU0936	deoxyribose-phosphate aldolase	F	296	958	1.11611e-06
deoA	SSU0937	pyrimidine-nucleoside phosphorylase	F	112	690	1.65845e-29
-	SSU0938	methyltransferase	J	53	357	3.8948e-43
-	SSU0966	transposase	L	58	175	4.24916e-06
-	SSU0967	transposase	L	106	268	6.35039e-06
-	SSU0969	hypothetical protein	S	121	422	1.54089e-07
-	SSU0970	membrane protein	NC	359	2392	1.25407e-50
-	SSU0971	hypothetical protein	NC	224	2001	9.05008e-107
-	SSU0972	haloacid dehalogenase	R	220	916	2.73491e-11
pepT	SSU0973	peptidase T	E	572	2056	5.009e-06
-	SSU0976	PadR family transcriptional regulator	K	22	193	6.4973e-38
-	SSU0977	hypothetical protein	S	18	229	1.23051e-169
-	SSU0978	membrane protein	S	65	1117	0
-	SSU0979	hypothetical protein	NC	16	316	0
folK	SSU0986	2-amino-4-hydroxy-6-hydroxymethyldihydropteridine pyrophosphokinase	H	174	308	0.00827154
folQ	SSU0987	dihydroneopterin aldolase	H	213	399	0.0035863
folP	SSU0988	dihydropteroate synthase	H	85	149	0.00784872
-	SSU0998	glycosyl hydrolase family protein	G	5	319	0
-	SSU0999	glycosyl hydrolase family protein	G	13	717	0
-	SSU1000	haloacid dehalogenase	R	17	996	0
kduD	SSU1001	D-mannonate oxidoreductase	I	7	402	0
uxuA	SSU1002	mannonate dehydratase	G	12	565	0
uxaC	SSU1003	glucuronate isomerase	G	5	160	0
dgoA	SSU1004	2-dehydro-3-deoxy-6-phosphogalactonate aldolase	G	5	137	0
-	SSU1005	GntR family transcriptional regulator	K	35	264	1.6028e-56
uidA	SSU1006	beta-D-glucuronidase	G	1	67	0
-	SSU1007	PfkB family carbohydrate kinase	G	0	40	0
-	SSU1008	sugar transporter	G	1	29	3.44471e-169
endA	SSU1009	competence associated endonuclease	NC	97	19	0.00181252
-	SSU1012	membrane protein	NC	131	24	0.000444706
atpB	SSU1019	ATP synthase A chain	C	32	6	0.00234112
zwf	SSU1025	glucose-6-phosphate 1-dehydrogenase	G	92	234	0.000241238
-	SSU1033	membrane protein	NC	84	363	1.41485e-18
-	SSU1037	hypothetical protein	S	79	11	1.72306e-06
ptsH	SSU1039	phosphocarrier protein HPr	G	329	697	0.000694017
acnA	SSU1042	aconitate hydratase	C	26	3	1.28961e-07
-	SSU1045	hypothetical protein	NC	161	33	0.00434445
-	SSU1047	LacI family regulatory protein	K	15	43	0.00011373
-	SSU1048	heparinase II/III-like protein	NC	6	32	6.54532e-15
-	SSU1054	membrane protein	U	3	146	0
agaD	SSU1055	N-acetylgalactosamine-specific phosphotransferase system (PTS), IID component	G	5	233	0
agaW	SSU1056	N-acetylgalactosamine-specific phosphotransferase system (PTS), IIC component	G	14	70	4.75312e-14
agaV	SSU1057	N-acetylgalactosamine-specific phosphotransferase system (PTS), IIB component	G	5	66	2.36979e-70
ugl	SSU1058	unsaturated glucuronyl hydrolase	NC	4	79	1.96664e-160
kgdA	SSU1061	keto-hydroxyglutarate-aldolase/keto-deoxy-phosphogluconate aldolase	G	11	54	3.07641e-09
-	SSU1062	PfkB family carbohydrate kinase	G	14	61	9.78315e-12
-	SSU1065	transposase	L	19	186	3.22943e-88
-	SSU1066	CAAX amino terminal protease family membrane protein	NC	3	66	1.12921e-165
-	SSU1067	hypothetical protein	NC	87	4640	0
-	SSU1068	CAAX amino terminal protease family membrane protein	NC	23	896	0
-	SSU1069	membrane protein	NC	17	561	0
-	SSU1070	membrane protein	NC	2	94	0
-	SSU1071	DNA-binding protein	K	177	8693	0
-	SSU1072	membrane protein	NC	23	824	0
-	SSU1073	membrane protein	NC	0	51	0
-	SSU1074	membrane protein	NC	0	70	0
-	SSU1075	membrane protein	NC	9	743	0
aroB	SSU1089	3-dehydroquinate synthase	E	54	126	8.25187e-05
-	SSU1090	ABC transporter ATP-binding protein	R	30	86	6.16648e-06
-	SSU1091	ABC transporter permease	R	5	24	4.98366e-08
-	SSU1092	lipoprotein	R	10	26	0.00209361
lacD2	SSU1095	tagatose 1,6-diphosphate aldolase	G	35	116	6.88011e-09
rplT	SSU1104	50S ribosomal protein L20	J	486	93	0.00233494
-	SSU1143	surface-anchored zinc carboxypeptidase	NC	27	262	2.25199e-119
-	SSU1151	hypothetical protein	E	12	44	7.35311e-08
-	SSU1153	PhoH-like protein	T	28	64	0.000651227
-	SSU1169	beta-fructofuranosidase	G	2	165	0
-	SSU1170	extracellular solute-binding protein	G	4	226	0
-	SSU1172	binding-protein-dependent transport system membrane protein	G	2	38	3.37366e-109
glnQ4	SSU1192	glutamine transporter, ATP-binding protein 4	E	193	14	9.14531e-35
-	SSU1193	glutamine-binding protein precursor	E	153	15	1.03874e-16
-	SSU1194	amino acid ABC transporter permease	E	68	5	1.41794e-32
-	SSU1195	amino acid ABC transporter permease	E	85	12	1.90743e-06
sao	SSU1201	surface-anchored protein	NC	49	8	8.60807e-06
ccpA	SSU1202	catabolite control protein A	K	120	376	6.79244e-08
-	SSU1210	ABC transporter permease	M	45	272	8.66236e-27
-	SSU1211	ABC transporter ATP-binding protein	V	28	170	7.97718e-29
tpx	SSU1213	thiol peroxidase	O	8	47	1.60107e-12
copA	SSU1214	copper-transporting ATPase	P	70	231	1.25062e-06
-	SSU1215	surface-anchored dipeptidase	E	7	592	0
-	SSU1216	tellurite resistance protein TehB	P	54	11	0.00404566
smpB	SSU1218	SsrA-binding protein	O	111	249	0.000124182
-	SSU1229	sugar phosphotransferase system (PTS), IIBC component	G	0	36	0
-	SSU1230	N-acetylmannosamine-6-phosphate 2-epimerase	G	1	58	0
sly	SSU1231	suilysin (hemolysin)	NC	15	2770	0
-	SSU1233	ABC transporter ATP-binding protein	V	33	88	6.02912e-06
-	SSU1234	ABC transporter ATP-binding protein	V	46	146	4.26023e-09
-	SSU1242	VanZ like family protein	NC	33	7	0.0061039
-	SSU1244	hypothetical protein	NC	11	97	9.19037e-31
glgP	SSU1265	glycogen phosphorylase	G	34	141	2.70016e-16
deoD	SSU1266	purine nucleoside phosphorylase	F	40	139	2.34781e-09
punA	SSU1267	purine nucleoside phosphorylase	F	121	530	2.60914e-19
-	SSU1268	ArsC family protein	P	115	444	4.63586e-14
deoB	SSU1269	phosphopentomutase	G	119	431	1.62043e-08
-	SSU1273	type I restriction-modification system M protein	V	12	36	1.29862e-05
-	SSU1274	type I restriction-modification system R protein	V	12	30	0.00047017
-	SSU1276	hypothetical protein	NC	22	185	9.37379e-69
-	SSU1278	flotillin family protein	S	40	2235	0
-	SSU1279	LemA family protein	S	41	2622	0
-	SSU1280	membrane protein	R	23	909	0
-	SSU1303	lipoprotein	NC	24	164	3.35565e-26
-	SSU1304	hypothetical protein	S	16	142	2.26234e-39
-	SSU1322	glycerate kinase	G	17	35	0.00718959
-	SSU1355	surface-anchored 5'-nucleotidase	F	24	344	1.96585e-305
sodA	SSU1356	superoxide dismutase [Mn]	P	137	310	0.0001896
dexB	SSU1368	glucan 1,6-alpha-glucosidase	G	20	39	0.00656517
msmE	SSU1372	multiple sugar-binding protein precursor	G	6	56	7.62173e-38
aga	SSU1373	alpha-galactosidase	G	2	26	5.0641e-81
-	SSU1379	membrane protein	NC	4	175	0
-	SSU1380	methyltransferase	R	71	232	6.10829e-10
-	SSU1381	hypothetical protein	L	66	180	0.00010249
-	SSU1382	membrane protein	NC	153	568	5.40911e-13
-	SSU1387	DEAD box helicase family protein	L	197	7	6.13101e-152
-	SSU1393	phosphomethylpyrimidine kinase	H	13	77	8.376e-20
-	SSU1399	hypothetical protein	NC	118	285	0.000649504
fabG	SSU1400	3-ketoacyl-ACP reductase	I	61	179	8.59962e-08
-	SSU1403	PadR family transcriptional regulator	K	33	94	0.00037867
-	SSU1404	membrane protein	NC	67	271	9.83215e-09
-	SSU1411	transaminase	E	24	83	1.70008e-09
-	SSU1416	hypothetical protein	NC	371	1220	6.16788e-07
-	SSU1417	hypothetical protein	R	76	229	6.09277e-07
-	SSU1422	transposase	L	59	141	0.000702666
-	SSU1425	hypothetical protein	S	52	299	4.05793e-28
-	SSU1427	aldo/keto reductase	R	176	430	0.00112869
-	SSU1428	membrane protein	S	35	612	0
-	SSU1429	GtrA-like protein	S	18	113	1.03571e-18
-	SSU1436	cytidine and deoxycytidylate deaminase	F	23	63	0.000658874
-	SSU1437	hypothetical protein	NC	50	117	0.00032385
-	SSU1444	PadR family transcriptional regulator	K	52	109	0.00228068
atoB	SSU1452	acetyl-CoA acetyltransferase	I	655	92	0.00118126
mvaS	SSU1453	3-hydroxy-3-methylglutaryl-CoA synthase	I	170	31	0.00187504
-	SSU1472	response regulator protein	T	67	139	0.000864001
pflC	SSU1480	pyruvate formate-lyase activating enzyme	O	161	512	1.48782e-07
-	SSU1499	ABC transporter ATP-binding protein	V	42	8	0.00592912
-	SSU1501	CsbD-like protein	S	92	523	4.9043e-25
-	SSU1502	phosphotyrosine protein phosphatase	T	36	305	9.36689e-55
-	SSU1503	membrane protein	S	94	216	0.000185647
-	SSU1504	acyltransferase	I	19	68	5.39874e-10
dnaI	SSU1536	primosomal protein DnaI	L	54	109	0.000824158
-	SSU1537	replication initiation and membrane attachment protein	L	47	104	0.000270021
nrdR	SSU1538	NrdR family transcriptional regulator	K	10	33	0.00093906
-	SSU1542	hypothetical protein	R	59	120	0.00418393
-	SSU1551	DNA-binding protein	K	10	1080	0
-	SSU1552	membrane protein	NC	24	941	0
-	SSU1553	membrane protein	NC	29	1392	0
-	SSU1554	membrane protein	NC	20	1110	0
-	SSU1555	membrane protein	NC	4	248	0
-	SSU1556	membrane protein	NC	3	337	0
-	SSU1557	hypothetical protein	S	122	4345	0
-	SSU1578	gamma-glutamyl hydrolase	R	40	4	3.20506e-11
-	SSU1588	type I restriction-modification system M protein	V	87	180	0.00661817
-	SSU1589	type I restriction-modification system S protein	V	67	139	0.00106644
-	SSU1590	type I restriction-modification system R protein	V	37	124	1.42838e-08
-	SSU1591	hypothetical protein	NC	26	68	0.000700549
-	SSU1596	acetyltransferase (GNAT) family protein	R	39	6	3.18169e-05
fabK	SSU1605	enoyl-ACP reductase	R	530	64	3.50163e-06
acpP	SSU1606	acyl carrier protein	I	44	4	4.3762e-10
fabH	SSU1607	3-oxoacyl-ACP synthase	I	1125	28	0
-	SSU1608	MarR family transcriptional regulator	K	269	25	1.86292e-19
-	SSU1609	enoyl-CoA hydratase	I	1203	9	0
scrB	SSU1619	sucrose-6-phosphate hydrolase	G	8	35	6.17157e-09
rpsR	SSU1628	30S ribosomal protein S18	J	24	4	0.00099405
rpsF	SSU1630	30S ribosomal protein S6	J	180	22	5.95354e-09
-	SSU1633	membrane protein	NC	163	25	1.8849e-05
acoL	SSU1634	dihydrolipoamide dehydrogenase	C	87	383	1.44259e-12
pdhC	SSU1635	branched-chain alpha-keto acid dehydrogenase subunit E2	C	67	264	9.89491e-15
pdhB	SSU1636	pyruvate dehydrogenase E1 component, beta subunit	C	54	263	2.67798e-25
pdhA	SSU1637	pyruvate dehydrogenase E1 component, alpha subunit	C	48	163	4.08803e-11
-	SSU1638	membrane protein	S	90	19	0.00276205
-	SSU1651	HIT-family protein	F	233	421	0.00663663
-	SSU1652	hypothetical protein	NC	46	240	7.324e-17
oppA	SSU1664	oligopeptide-binding protein OppA precursor	E	161	905	7.12345e-16
-	SSU1665	D-alanyl-D-alanine carboxypeptidase	M	13	36	0.000301687
-	SSU1677	hypothetical protein	NC	105	214	0.0059324
-	SSU1678	membrane protein	O	92	2084	0
ilvA	SSU1679	threonine dehydratase	E	156	1934	3.83037e-148
-	SSU1687	hypothetical protein	NC	45	107	0.00150101
-	SSU1688	hypothetical protein	R	130	266	0.000847567
-	SSU1698	membrane protein	NC	64	1	1.69809e-190
msmK	SSU1701	multiple sugar-binding transport ATP-binding protein	G	11	29	0.000932967
-	SSU1704	sensor histidine kinase	T	7	23	7.5642e-06
-	SSU1707	extracellular solute-binding protein	G	1	1261	0
-	SSU1708	binding-protein-dependent transport system membrane protein	G	0	153	0
-	SSU1709	binding-protein-dependent transport system membrane protein	G	0	156	0
gcnA	SSU1710	N-acetyl-beta-D-glucosaminidase	NC	2	72	0
-	SSU1711	ROK family protein	K	6	59	2.03624e-45
-	SSU1712	glycosyl hydrolases family protein	G	1	133	0
-	SSU1713	hypothetical protein	S	0	121	0
-	SSU1714	alpha-1,2-mannosidase	G	2	126	0
-	SSU1715	endo-beta-N-acetylglucosaminidase	G	0	72	0
-	SSU1725	sugar phosphotransferase system (PTS), IIBC component	G	11	40	2.78858e-08
murQ	SSU1726	N-acetylmuramic acid 6-phosphate etherase	R	13	85	4.16762e-25
leuC	SSU1739	3-isopropylmalate dehydratase large subunit	E	10	34	3.95095e-06
leuB	SSU1740	3-isopropylmalate dehydrogenase	C	9	32	1.8409e-05
leuA	SSU1741	2-isopropylmalate synthase	E	7	25	2.27345e-06
-	SSU1744	nitroreductase family protein	R	43	145	4.83954e-09
ssnA	SSU1760	surface-anchored DNA nuclease	R	38	702	0
-	SSU1763	MutT/NUDIX hydrolase family protein	F	185	2802	1.08351e-247
-	SSU1764	nicotinamide mononucleotide transporter	H	115	1446	1.32114e-224
-	SSU1765	transcriptional regulator	H	108	713	2.5616e-50
-	SSU1769	hypothetical protein	NC	26	60	0.00164068
-	SSU1773	surface-anchored serine protease	O	68	673	6.09448e-48
purR	SSU1780	pur operon repressor	F	57	197	8.80303e-12
rpe	SSU1785	ribulose-phosphate 3-epimerase	G	64	132	0.000927326
mutX	SSU1797	mutator protein	F	10	31	0.00211178
rpmH	SSU1803	50S ribosomal protein L34	NC	105	15	2.19681e-06
argH	SSU1807	argininosuccinate lyase	E	0	36	0
-	SSU1809	membrane protein	NC	5	137	0
-	SSU1819	hypothetical protein	S	137	23	9.73205e-05
-	SSU1820	carbonic anhydrase	P	84	11	3.76809e-08
-	SSU1829	rhomboid family membrane protein	R	130	21	1.56828e-05
-	SSU1830	5-formyltetrahydrofolate cyclo-ligase	H	852	104	3.01926e-06
-	SSU1831	peptidase	R	33	80	9.02802e-05
dapD	SSU1832	2,3,4,5-tetrahydropyridine-2,6-dicarboxylate N-succinyltransferase	E	65	153	4.64899e-05
-	SSU1840	L-ascorbate 6-phosphate lactonase	R	3	27	9.04613e-20
-	SSU1844	L-xylulose 5-phosphate 3-epimerase	G	0	68	0
ulaD	SSU1845	3-keto-L-gulonate-6-phosphate decarboxylase	G	0	38	0
-	SSU1847	sugar phosphotransferase system (PTS), lactose/cellobiose-specific family, IIB subunit protein	G	2	70	2.28318e-175
-	SSU1848	PTS system ascorbate-specific transporter subunit IIC	S	0	32	0
-	SSU1849	surface-anchored amylopullulanase	G	7	240	0
glnQ5	SSU1851	glutamine transporter, ATP-binding protein 5	E	87	3	1.63465e-127
-	SSU1852	amino acid ABC transporter permease	E	66	5	9.19037e-31
-	SSU1853	amino acid ABC transporter substrate-binding protein	E	288	5	0
-	SSU1855	sugar phosphotransferase system (PTS), IIC component	G	3	50	1.41399e-117
-	SSU1857	sugar phosphotransferase system (PTS), lactose/cellobiose-specific family, IIA component	G	1	26	1.24091e-63
-	SSU1858	sugar phosphotransferase system (PTS), lactose/cellobiose-specific family, IIB component	G	0	105	0
-	SSU1859	transcriptional regulator (antiterminator)	K	2	60	5.09481e-296
pepO	SSU1864	endopeptidase O	O	240	673	0.00237265
-	SSU1868	membrane protein	NC	463	2330	3.46713e-26
-	SSU1869	extracellular metal cation-binding protein	P	280	1511	1.0902e-17
scaR	SSU1870	metal-dependent transcriptional regulator	K	289	943	8.85691e-07
-	SSU1879	bifunctional 2',3'-cyclic nucleotide 2'-phosphodiesterase/3'-nucleotidase precursor protein	F	50	559	7.04191e-146
nrdG	SSU1899	anaerobic ribonucleoside-triphosphate reductase activating protein	O	62	10	0.000164189
-	SSU1902	hypothetical protein	NC	96	11	2.13287e-09
nrdD	SSU1903	anaerobic ribonucleoside triphosphate reductase	F	182	29	0.00201115
malQ	SSU1914	4-alpha-glucanotransferase	G	49	283	1.67637e-37
malX	SSU1915g	maltose/maltodextrin-binding protein precursor	G	211	4460	0
malC	SSU1916	maltose/maltodextrin ABC ABC transporter permease	G	56	302	1.63841e-32
malD	SSU1917h	maltose/maltodextrin ABC ABC transporter permease	G	15	71	1.56861e-12
malA	SSU1918	maltodextrose utilization protein MalA	S	15	94	8.53112e-24
malR	SSU1919	maltose operon transcriptional repressor	K	110	587	1.63127e-31
-	SSU1920	alpha amylase	G	82	395	2.36212e-15
nrdI	SSU1921	protein nrdI	F	61	11	0.000878745
-	SSU1925	aldo/keto reductase	R	17	43	0.000740469
-	SSU1929	beta-glucosidase	G	5	28	1.5767e-16
-	SSU1936	hypothetical protein	NC	2080	243	8.06155e-08
-	SSU1950	hypothetical protein	M	58	8	7.07546e-08
a expression level = 0 indicates a very low q-value that lies under the measurement limit

## Sheet: Table S3
Supplementary Table S3. Overview of significantly higher and lower expressed genes of the S. suis wildtype strain 10 in porcine CSF as determined by Rockhopper analysis.
Gene	locus tag	Gene product	COGs	Expression in THB	Expression in CSF	qValue THB vs CSFa
	strain P1/7
prsA1	SSU0021	ribose-phosphate pyrophosphokinase	F	209	71	1.84507e-05
purC	SSU0026	phosphoribosylaminoimidazole-succinocarboxamide synthase	F	0	300	0
-	SSU0027	phosphoribosylformylglycinamidine synthase protein	F	2	563	0
purF	SSU0028	amidophosphoribosyltransferase	F	1	475	0
purM	SSU0029	phosphoribosylaminoimidazole synthetase	F	3	562	0
purN	SSU0030	phosphoribosylglycinamide formyltransferase	F	2	640	0
purH	SSU0031	bifunctional phosphoribosylaminoimidazolecarboxamide formyltransferase/IMP cyclohydrolase	F	2	782	0
purD	SSU0032	phosphoribosylamine--glycine ligase	F	16	524	0
purE	SSU0033	phosphoribosylaminoimidazole carboxylase catalytic subunit	F	6	216	0
purK	SSU0034	phosphoribosylaminoimidazole carboxylase ATPase subunit	F	16	666	0
-	SSU0036	hypothetical protein	NC	4	30	1.08249e-22
purB	SSU0037	adenylosuccinate lyase	F	49	160	1.62864e-09
-	SSU0054	folylpolyglutamate synthase	H	60	25	0.00800318
-	SSU0055	hypothetical protein	NC	24	1	7.87465e-149
rpsJ	SSU0069	30S ribosomal protein S10	J	520	125	6.1949e-10
rplC	SSU0070	50S ribosomal protein L3	J	2053	394	3.41698e-13
rplD	SSU0071	50S ribosomal protein L4	J	633	138	9.68243e-15
rplW	SSU0072	50S ribosomal protein L23	J	933	242	5.38832e-10
rplB	SSU0073	50S ribosomal protein L2	J	1071	242	1.05644e-07
rpsS	SSU0074	30S ribosomal protein S19	J	1988	570	0.000396251
rplV	SSU0075	50S ribosomal protein L22	J	2546	767	0.000425393
rpsC	SSU0076	30S ribosomal protein S3	J	280	75	1.29149e-07
rplP	SSU0077	50S ribosomal protein L16	J	879	264	7.2629e-07
rpmC	SSU0078	50S ribosomal protein L29	NC	973	403	0.00276884
rpsQ	SSU0079	30S ribosomal protein S17	J	873	362	0.00130527
rplN	SSU0080	50S ribosomal protein L14	J	313	122	0.00478067
rplX	SSU0081	50S ribosomal protein L24	J	2856	897	0.00158592
rplE	SSU0082	50S ribosomal protein L5	J	1099	335	0.00151722
rpsN	SSU0083	30S ribosomal protein S14	J	2497	666	9.83204e-07
-	SSU0084	hypothetical protein	NC	4810	1577	0.00232351
rpsH	SSU0085	30S ribosomal protein S8	J	351	102	2.49407e-06
-	SSU0086	hypothetical protein	NC	1175	256	9.28245e-13
rplF	SSU0088	50S ribosomal protein L6	J	473	132	1.42271e-08
rplR	SSU0089	50S ribosomal protein L18	J	1736	461	9.32087e-05
rpsE	SSU0090	30S ribosomal protein S5	J	279	84	7.45456e-06
rpmD	SSU0091	50S ribosomal protein L30	J	1215	384	1.89959e-06
rplO	SSU0092	50S ribosomal protein L15	J	761	262	0.000174188
secY	SSU0093	preprotein translocase SecY subunit	U	422	137	0.00411964
adk	SSU0094	adenylate kinase	F	228	49	1.56987e-13
infA	SSU0095	translation initiation factor IF-1	J	1036	367	0.000142811
rpsK	SSU0098	30S ribosomal protein S11	J	483	200	0.00300963
rplQ	SSU0100	50S ribosomal protein L17	J	361	136	0.0012197
-	SSU0124	hypothetical protein	S	23	152	1.33425e-21
-	SSU0133	hypothetical protein	L	248	112	0.0093379
-	SSU0135	membrane protein	NC	22	58	0.00172983
folC	SSU0136	folypolyglutamate synthase	H	28	58	0.00619465
-	SSU0145	membrane protein	NC	26	1	2.2871e-90
groES	SSU0146	co-chaperonin GroES	O	321	58	3.34498e-19
groEL	SSU0147	molecular chaperone GroEL	O	290	47	3.89058e-28
rpsL	SSU0148	30S ribosomal protein S12	J	2678	637	1.10304e-06
rpsG	SSU0149	30S ribosomal protein S7	J	1096	219	1.12301e-18
fus	SSU0151	elongation factor G	J	440	142	0.0040406
-	SSU0152	endopeptidase	O	209	23	7.05838e-60
glnR	SSU0156	MerR family transcriptional regulator	K	547	91	5.06592e-24
glnA	SSU0157	glutamine synthetase	E	221	43	2.80729e-18
-	SSU0164	extracellular solute-binding lipoprotein	G	6	31	1.27072e-11
-	SSU0173	membrane protein	NC	5	26	2.6957e-10
pfl	SSU0191	formate acetyltransferase	C	129	366	0.00237938
-	SSU0196	HhH-GPD superfamily base excision DNA repair protein	L	138	265	0.00300963
-	SSU0215	hypothetical protein	NC	48	95	0.00491825
treA	SSU0216	trehalose-6-phosphate hydrolase	G	469	2	0
-	SSU0217	sugar phosphotransferase system (PTS), IIABC component	G	276	3	0
-	SSU0223	thioredoxin	O	27	80	0.00159932
-	SSU0227	membrane protein	S	8	28	4.80511e-07
-	SSU0228	membrane protein	S	7	33	1.55365e-12
-	SSU0229	ABC transporter ATP-binding protein	V	13	66	4.75951e-11
-	SSU0230	sodium:alanine symporter family protein	E	53	5	6.59916e-37
gdh	SSU0234	glutamate dehydrogenase	E	67	876	2.77165e-248
pyrD	SSU0235	dihydroorotate dehydrogenase 1A	F	22	224	4.34355e-99
-	SSU0248	formate/nitrite transporter family protein	P	73	24	2.32266e-05
-	SSU0253	surface-anchored protein	S	690	16	0
rpmF	SSU0258	50S ribosomal protein L32	J	1752	645	0.000854905
hisS	SSU0259	histidyl-tRNA synthetase	J	29	7	1.65394e-05
adhE	SSU0261	bifunctional acetaldehyde-CoA/alcohol dehydrogenase	C	399	77	4.92559e-11
-	SSU0262	threonine synthase	E	68	297	3.65429e-19
-	SSU0263	ABC transporter ATP-binding protein	C	38	72	0.00457608
-	SSU0275	hypothetical protein	T	55	479	1.15664e-59
-	SSU0276	hypothetical protein	S	49	399	1.58506e-81
hrcA	SSU0278	heat-inducible transcription repressor	K	171	36	2.9277e-13
grpE	SSU0279	heat shock protein GrpE	O	460	79	1.09776e-21
dnaK	SSU0280	molecular chaperone DnaK	O	634	146	6.79845e-07
dnaJ	SSU0281	molecular chaperone DnaJ	O	85	14	1.21112e-22
-	SSU0282	hypothetical protein	H	13	42	6.91675e-05
-	SSU0283	amidase	J	42	101	5.16458e-05
-	SSU0284	extracellular solute-binding protein	E	40	120	8.18599e-07
-	SSU0288	cation-transporting ATPase	P	183	7	0
pyrG	SSU0311	CTP synthetase	F	34	6	2.67988e-11
rpmB	SSU0313	50S ribosomal protein L28	J	2198	459	2.4719e-16
-	SSU0318	universal stress protein	T	29	265	2.3248e-63
rplS	SSU0322	50S ribosomal protein L19	J	381	99	2.03733e-08
-	SSU0327	deoxyguanosinetriphosphate triphosphohydrolase	F	7	30	2.43806e-08
galR	SSU0328	galactose operon repressor	K	107	211	0.00175961
galT	SSU0330	galactose-1-phosphate uridylyltransferase	G	10	42	4.59929e-10
malM	SSU0353	4-alpha-glucanotransferase	G	56	4	5.12826e-83
glgP	SSU0354	glycogen phosphorylase	G	36	3	1.84407e-50
-	SSU0356	endonuclease/exonuclease/phosphatase family protein	R	43	8	9.24521e-08
-	SSU0357	glucose-specific phosphotransferase system (PTS), IIABC component	G	35	10	2.58842e-08
-	SSU0361	hypothetical protein	S	28	3	1.53144e-17
-	SSU0362	hypothetical protein	S	64	9	2.26968e-14
-	SSU0363	hypothetical protein	NC	7	27	2.6037e-05
recU	SSU0371	Holliday junction-specific endonuclease	R	115	235	0.000939553
-	SSU0388	response regulator protein	T	263	106	0.00077345
cysM	SSU0391	cysteine synthase	E	316	26	3.04282e-152
-	SSU0395	sigma 54 modulation protein / S30EA ribosomal protein	J	143	996	4.33169e-57
-	SSU0406	sugar phosphotransferase system (PTS), fructose family, IIA component	G	20	78	1.48051e-06
-	SSU0407	aldose 1-epimerase	G	14	36	0.00241729
-	SSU0408	hypothetical protein	NC	407	18	2.58518e-210
-	SSU0409	hypothetical protein	NC	155	7	1.03401e-207
asnA	SSU0420	asparagine synthetase AsnA	E	170	627	1.07691e-08
-	SSU0442	hypothetical protein	NC	137	676	4.5316e-25
-	SSU0443	MutT/NUDIX hydrolase family protein	F	75	329	6.98903e-17
glnQ3	SSU0447	glutamine transporter, ATP-binding protein 3	E	25	65	0.000461484
folD	SSU0448	bifunctional 5,10-methylene-tetrahydrofolate dehydrogenase/ 5,10-methylene-tetrahydrofolate cyclohydrolase	H	34	143	3.38101e-14
-	SSU0457	peptidase	O	83	8	1.24884e-41
-	SSU0458	peptidase	O	400	36	3.70396e-94
-	SSU0460	hypothetical protein	NC	259	51	1.38389e-15
-	SSU0462	BioY family protein	R	88	9	1.63136e-31
-	SSU0471	phosphoglycerate mutase family protein	G	67	17	5.27148e-06
-	SSU0472	hypothetical protein	S	63	20	0.00242564
-	SSU0477	lipoprotein	NC	41	5	9.64778e-20
ftsW	SSU0478	cell division protein	D	31	93	3.7121e-07
ppc	SSU0479	phosphoenolpyruvate carboxylase	C	24	66	6.52431e-07
-	SSU0489	adenosine deaminase	F	92	672	1.00136e-62
-	SSU0490	membrane protein	NC	18	47	0.00079305
dnaE	SSU0493	DNA polymerase III DnaE	L	49	117	0.001528
glmS	SSU0500	glucosamine--fructose-6-phosphate aminotransferase	M	133	33	8.86124e-11
-	SSU0501	amino acid ABC transporter permease	E	29	157	9.08018e-22
-	SSU0502	amino acid ABC transporter ATP-binding protein	E	93	542	2.2958e-35
-	SSU0503	amino acid ABC transporter permease/substrate-binding protein	E	155	1012	7.14785e-39
-	SSU0506	metallo-beta-lactamase superfamily protein	R	38	139	4.38957e-10
-	SSU0512	hypothetical protein	S	462	70	3.9896e-34
-	SSU0541	transposase	L	68	165	0.000454641
-	SSU0542	transposase	L	99	192	0.00566239
aroK	SSU0558	shikimate kinase	E	124	236	0.00798116
-	SSU0566	transposase	L	52	175	3.2449e-07
-	SSU0567	transposase	L	97	182	0.00893304
arcA	SSU0580	arginine deiminase	E	44	1796	0
-	SSU0581	acetyltransferase (GNAT) family protein	R	21	938	0
arcB	SSU0582	ornithine carbamoyltransferase	E	14	590	0
arcC	SSU0583	carbamate kinase	E	5	263	0
-	SSU0584	C4-dicarboxylate anaerobic carrier protein	S	2	118	0
-	SSU0594	hypothetical protein	NC	40	3	3.37043e-41
fhuC	SSU0607	ferrichrome ABC transporter ATP-binding protein	P	51	18	0.0019082
-	SSU0613	hypothetical protein	K	60	158	2.44582e-05
serC	SSU0621	phosphoserine aminotransferase	H	9	170	1.10025e-254
-	SSU0622	acetyltransferase (GNAT) family protein	NC	20	396	0
-	SSU0623	D-isomer specific 2-hydroxyacid dehydrogenase	H	29	434	3.38037e-285
ogt	SSU0624	methylated-DNA--protein-cysteine methyltransferase	L	33	461	2.66007e-190
-	SSU0625	ArsC family protein	P	33	432	9.90477e-140
-	SSU0642	type III restriction-modification system, restriction enzyme	V	9	24	4.60896e-05
coaC	SSU0646	phosphopantothenoylcysteine decarboxylase	H	80	25	0.000124234
dpfB	SSU0647	phosphopantothenate--cysteine ligase	H	42	10	7.60654e-05
fhs	SSU0648	formate--tetrahydrofolate ligase	F	23	122	2.21002e-26
-	SSU0649	membrane protein	S	33	3	1.64351e-44
-	SSU0655	hypothetical protein	NC	4	45	1.27679e-56
asd	SSU0671	aspartate-semialdehyde dehydrogenase	E	15	147	5.28466e-81
dapA	SSU0672	dihydrodipicolinate synthase	E	28	236	1.23313e-72
nox	SSU0682	NADH oxidase	R	106	634	1.40536e-27
-	SSU0709	glycerol-3-phosphate acyltransferase PlsY	S	74	16	9.20364e-09
-	SSU0711	hypothetical protein	NC	50	21	0.00993044
-	SSU0715	membrane protein	S	173	50	1.10846e-07
parC	SSU0717	DNA topoisomerase IV subunit A	L	92	23	1.42181e-09
-	SSU0718	hypothetical protein	NC	40	9	5.56215e-05
-	SSU0719	branched-chain amino acid aminotransferase	E	81	277	7.46176e-11
rpsA	SSU0721	30S ribosomal protein S1	J	121	53	0.0039826
-	SSU0722	L-threonine aldolase	E	112	35	3.042e-05
thiI	SSU0726	thiamine biosynthesis protein ThiI	H	54	21	0.0013576
rplU	SSU0728	50S ribosomal protein L21	J	2669	777	1.74193e-05
rpmA	SSU0729	50S ribosomal protein L27	J	247	67	1.22997e-08
pyrR	SSU0735	bifunctional pyrimidine regulatory protein PyrR uracil phosphoribosyltransferase	F	37	117	1.86556e-06
pyrB	SSU0736	aspartate carbamoyltransferase	F	20	71	2.99101e-08
carA	SSU0737	carbamoyl phosphate synthase small subunit	E	38	169	1.07489e-18
carB	SSU0738	carbamoyl phosphate synthase large subunit	E	37	143	2.62284e-12
rpsP	SSU0742	30S ribosomal protein S16	J	869	324	0.000246587
-	SSU0744	ABC transporter ATP-binding protein/permease	V	26	8	8.29529e-05
-	SSU0746	polysaccharide deacetylase	G	88	246	9.85508e-07
hom	SSU0747	homoserine dehydrogenase	E	99	372	6.43705e-11
thrB	SSU0748	homoserine kinase	E	35	119	2.1715e-08
prtS	SSU0757	cell envelope proteinase	O	11	110	4.90199e-120
-	SSU0758	carbohydrate kinase	G	27	88	2.04956e-07
nth	SSU0759	endonuclease III	L	36	76	0.00568341
-	SSU0760	guanosine 5'-monophosphate oxidoreductase	F	33	4	3.82291e-18
glkA	SSU0775	glucokinase	K	68	17	1.84171e-08
-	SSU0792	hypothetical protein	J	126	328	3.78984e-06
-	SSU0796	membrane protein	NC	41	13	0.00620839
-	SSU0802	restriction enzyme	V	18	42	0.00121575
-	SSU0803	5-methylcytosine-specific restriction enzyme subunit McrC	V	11	32	0.000454641
-	SSU0838	hypothetical protein	I	11	483	0
-	SSU0839	esterase	S	4	180	0
-	SSU0840	esterase	R	28	503	0
rplL	SSU0845	50S ribosomal protein L7/L12	J	1058	175	4.74171e-30
rplJ	SSU0846	50S ribosomal protein L10	J	580	104	3.96253e-20
topA	SSU0847	DNA topoisomerase I	L	64	10	2.07509e-33
-	SSU0853	hypothetical protein	NC	50	4	2.18137e-62
-	SSU0854	hemolysin-III-like membrane protein	R	83	4	1.20376e-124
rnhB	SSU0856	ribonuclease HII	L	84	24	3.09104e-07
rbgA	SSU0857	ribosomal biogenesis GTPase	R	92	27	2.37458e-07
sntC	SSU0860	5'-nucleotidase	F	55	633	2.37006e-162
pyrC	SSU0861	dihydroorotase	F	51	103	0.0019064
ung	SSU0862	uracil-DNA glycosylase	L	40	109	3.03955e-05
pyrE	SSU0864	orotate phosphoribosyltransferase	F	25	154	4.58381e-26
glgC	SSU0870	glucose-1-phosphate adenylyltransferase	G	30	80	3.57108e-05
glgA	SSU0873	glycogen synthase	G	32	103	7.8215e-10
glgB	SSU0874	1,4-alpha-glucan branching enzyme	G	18	61	3.44479e-08
-	SSU0875	extracellular amino acid-binding protein	E	25	122	3.43266e-17
zmpC	SSU0879	IgA-specific zinc metalloproteinase	S	11	26	0.000119418
uvrB	SSU0882	excinuclease ABC subunit B	L	42	84	0.00160499
-	SSU0883	glutamine ABC transporter, glutamine-binding protein/permease protein	E	129	42	3.78984e-06
glnQ1	SSU0884	glutamine ABC transporter ATP-binding protein 1	E	461	164	0.00070056
-	SSU0911	ABC transporter ATP-binding protein	V	42	9	3.38768e-12
-	SSU0912	ABC transporter ATP-binding protein	V	26	6	6.66178e-07
-	SSU0914	RNA pseudouridylate synthase	J	83	33	0.00462235
rex	SSU0922	redox-sensing transcriptional repressor Rex	R	65	271	1.53369e-16
-	SSU0923	peptidase	R	8	25	0.00508604
cdd	SSU0935	cytidine deaminase	F	139	275	0.0047679
-	SSU0966	transposase	L	70	158	0.00155337
-	SSU0982	membrane protein	S	7	53	5.70855e-24
-	SSU0983	membrane protein	S	17	94	2.71541e-13
-	SSU0984	cation efflux family protein	P	58	173	2.60592e-08
folK	SSU0986	2-amino-4-hydroxy-6-hydroxymethyldihydropteridine pyrophosphokinase	H	174	310	0.00924899
folQ	SSU0987	dihydroneopterin aldolase	H	213	398	0.00455926
folP	SSU0988	dihydropteroate synthase	H	85	172	0.00137626
-	SSU0993	hypothetical protein	NC	18	71	5.7433e-05
endA	SSU1009	competence associated endonuclease	NC	97	21	1.0309e-12
epuA	SSU1010	competence associated protein	NC	117	26	2.84767e-05
zwf	SSU1025	glucose-6-phosphate 1-dehydrogenase	G	92	374	2.45079e-12
-	SSU1037	hypothetical protein	S	79	3	1.86495e-220
ptsH	SSU1039	phosphocarrier protein HPr	G	329	1007	1.84171e-08
acnA	SSU1042	aconitate hydratase	C	26	1	1.36784e-83
nrdH	SSU1043	glutaredoxin-like protein	O	33	10	0.00429523
-	SSU1045	hypothetical protein	NC	161	58	0.00645302
-	SSU1047	LacI family regulatory protein	K	15	43	0.000114826
-	SSU1049	hypothetical protein	NC	58	17	0.00122845
aroF1	SSU1086	phospho-2-dehydro-3-deoxyheptonate aldolase	E	44	106	7.25771e-05
aroF2	SSU1087	phospho-2-dehydro-3-deoxyheptonate aldolase	E	25	68	2.29339e-05
aroE	SSU1088	shikimate 5-dehydrogenase	E	69	159	0.000162078
aroB	SSU1089	3-dehydroquinate synthase	E	54	165	1.91466e-08
-	SSU1090	ABC transporter ATP-binding protein	R	30	306	1.12776e-110
-	SSU1091	ABC transporter permease	R	5	68	5.90368e-87
-	SSU1092	lipoprotein	R	10	99	1.0223e-62
-	SSU1093	lipoprotein	R	40	290	1.72568e-57
rplT	SSU1104	50S ribosomal protein L20	J	486	125	2.47246e-08
rpmI	SSU1105	50S ribosomal protein L35	J	886	205	8.60592e-11
infC	SSU1106	translation initiation factor IF-3	J	1179	263	2.03519e-08
-	SSU1108	membrane protein	NC	303	109	0.000462672
-	SSU1135	NIF3 (NGG1p interacting factor 3) family protein	S	87	17	1.85771e-13
-	SSU1136	hypothetical protein	R	110	31	6.04541e-08
-	SSU1137	DNA replication protein DnaD	L	83	31	0.000425983
-	SSU1143	surface-anchored zinc carboxypeptidase	NC	27	9	0.000295943
-	SSU1149	hypothetical protein	NC	50	169	6.46183e-05
-	SSU1151	hypothetical protein	E	12	30	0.00254581
-	SSU1161	polysaccharide biosynthesis protein	R	56	22	0.00525418
-	SSU1163	hypothetical protein	NC	132	308	0.000459964
rplA	SSU1164	50S ribosomal protein L1	J	216	86	0.00133216
rplK	SSU1165	50S ribosomal protein L11	J	756	205	3.56033e-09
-	SSU1170	extracellular solute-binding protein	G	4	29	1.90485e-21
-	SSU1180	cation-transporting ATPase	P	110	6	2.33511e-292
recR	SSU1185	recombination protein RecR	L	123	47	0.00104078
glnQ4	SSU1192	glutamine transporter, ATP-binding protein 4	E	193	25	6.93414e-49
-	SSU1193	glutamine-binding protein precursor	E	153	21	8.48245e-39
-	SSU1194	amino acid ABC transporter permease	E	68	11	4.06362e-13
-	SSU1195	amino acid ABC transporter permease	E	85	13	1.07904e-15
thrS	SSU1196	threonyl-tRNA synthetase	J	61	18	6.26457e-06
sao	SSU1201	surface-anchored protein	NC	49	3	6.0135e-94
tgt	SSU1204	queuine tRNA-ribosyltransferase	J	89	28	2.29339e-05
tpx	SSU1213	thiol peroxidase	O	8	99	4.61183e-67
-	SSU1215	surface-anchored dipeptidase	E	7	34	8.30471e-13
-	SSU1216	tellurite resistance protein TehB	P	54	22	0.00328893
rnr	SSU1219	exoribonuclease R	K	108	42	0.000481409
coaE	SSU1223	dephospho-CoA kinase	H	104	37	9.71217e-05
fpg	SSU1224	formamidopyrimidine-DNA glycosylase	L	55	19	0.000854905
sly	SSU1231	suilysin (hemolysin)	NC	15	334	0
-	SSU1233	ABC transporter ATP-binding protein	V	33	6	1.84793e-12
-	SSU1234	ABC transporter ATP-binding protein	V	46	10	2.65075e-12
-	SSU1244	hypothetical protein	NC	11	46	9.36062e-06
-	SSU1246	cation transporting ATPase	P	22	55	2.29339e-05
rpsU	SSU1259	30S ribosomal protein S21	J	3907	818	3.34451e-09
-	SSU1274	type I restriction-modification system R protein	V	12	26	0.00782099
-	SSU1276	hypothetical protein	NC	22	59	9.75565e-05
-	SSU1278	flotillin family protein	S	40	183	9.21229e-21
-	SSU1279	LemA family protein	S	41	188	4.37536e-17
-	SSU1280	membrane protein	R	23	93	8.13193e-11
-	SSU1289	ABC transporter ATP-binding protein	R	54	11	5.56408e-14
-	SSU1305	ABC transporter ATP-binding protein	R	16	49	0.000149694
-	SSU1307	hypothetical protein	R	7	27	6.12154e-05
-	SSU1308	6-phospho-beta-glucosidase	G	75	1	0
-	SSU1309	beta-glucoside-specific phosphotransferase system (PTS), IIABC component	G	292	4	0
-	SSU1355	surface-anchored 5'-nucleotidase	F	24	303	1.39135e-226
sodA	SSU1356	superoxide dismutase [Mn]	P	137	748	2.95066e-31
-	SSU1360	branched-chain amino acid transport ATP-binding protein	E	59	163	1.94026e-06
-	SSU1361	branched-chain amino acid transport ATP-binding protein	E	40	106	7.16973e-05
-	SSU1362	branched-chain amino acid ABC transporter permease	E	10	34	1.2935e-05
-	SSU1364	branched-chain amino acid ABC transporter, amino acid-binding protein	E	50	627	2.00364e-212
dexB	SSU1368	glucan 1,6-alpha-glucosidase	G	20	42	0.00515741
-	SSU1379	membrane protein	NC	4	37	4.67725e-17
-	SSU1387	DEAD box helicase family protein	L	197	23	2.81615e-51
-	SSU1393	phosphomethylpyrimidine kinase	H	13	92	7.32309e-30
-	SSU1411	transaminase	E	24	77	1.62675e-07
-	SSU1422	transposase	L	48	169	1.1071e-07
-	SSU1427	aldo/keto reductase	R	176	393	0.00232575
-	SSU1431	methionine aminopeptidase	J	59	22	0.000671506
-	SSU1432	acetyltransferase (GNAT) family protein	J	88	34	0.000999673
murZ	SSU1433	UDP-N-acetylglucosamine 1-carboxyvinyltransferase	M	115	46	0.00188502
atoB	SSU1452	acetyl-CoA acetyltransferase	I	655	197	2.29339e-05
mvaS	SSU1453	3-hydroxy-3-methylglutaryl-CoA synthase	I	170	46	9.93168e-08
mvaA	SSU1454	3-hydroxy-3-methylglutaryl-CoA reductase	I	70	24	0.000382479
ppaC	SSU1478	manganese-dependent inorganic pyrophosphatase	C	98	189	0.00279521
-	SSU1499	ABC transporter ATP-binding protein	V	42	14	0.00175345
-	SSU1501	CsbD-like protein	S	92	1207	7.35644e-181
-	SSU1502	phosphotyrosine protein phosphatase	T	36	286	1.08992e-48
-	SSU1505	PAP2 superfamily protein	I	13	69	2.3437e-12
-	SSU1506	membrane protein	S	6	39	3.09323e-12
-	SSU1519	pyridoxal-dependent decarboxylase	E	66	129	0.00214786
-	SSU1531	helicase	K	41	108	5.10488e-05
dnaI	SSU1536	primosomal protein DnaI	L	54	109	0.00276884
-	SSU1537	replication initiation and membrane attachment protein	L	47	92	0.00610018
nrdR	SSU1538	NrdR family transcriptional regulator	K	10	37	0.000271731
gnd	SSU1541	6-phosphogluconate dehydrogenase	G	151	365	0.0011409
-	SSU1567	MATE family efflux protein	V	50	19	0.000379913
glyS	SSU1570	glycyl-tRNA synthetase subunit beta	J	76	30	0.000761411
glyQ	SSU1571	glycyl-tRNA synthetase subunit alpha	J	143	42	3.10671e-06
-	SSU1572	hypothetical protein	R	79	26	0.000906743
-	SSU1573	hypothetical protein	S	34	96	1.47593e-05
-	SSU1578	gamma-glutamyl hydrolase	R	40	0	0
-	SSU1581	permease	R	2	36	2.94362e-72
accA	SSU1597	acetyl-CoA carboxylase subunit alpha	I	451	144	1.1958e-05
fabZ	SSU1600	(3R)-hydroxymyristoyl-ACP dehydratase	I	187	68	0.000366256
fabE	SSU1601	acetyl-CoA carboxylase biotin carboxyl carrier protein subunit	I	643	233	0.000219153
fabG	SSU1603	3-ketoacyl-ACP reductase	I	688	208	0.000643443
fabD	SSU1604	malonyl CoA-acyl carrier protein transacylase	I	408	109	5.87205e-10
fabK	SSU1605	enoyl-ACP reductase	R	530	128	2.51815e-08
fabH	SSU1607	3-oxoacyl-ACP synthase	I	1125	192	5.51446e-13
-	SSU1608	MarR family transcriptional regulator	K	269	99	0.00150989
-	SSU1609	enoyl-CoA hydratase	I	1203	79	9.52525e-258
-	SSU1611	aspartate kinase	E	41	179	4.05147e-18
alr	SSU1613	alanine racemase	M	37	74	0.004255
-	SSU1616	hypothetical protein	NC	35	2	1.25695e-107
scrB	SSU1619	sucrose-6-phosphate hydrolase	G	8	29	6.17179e-06
uvrA	SSU1625	excinuclease ABC subunit A	L	61	22	7.91739e-05
rpsR	SSU1628	30S ribosomal protein S18	J	24	4	1.94679e-09
ssb	SSU1629	single-stranded DNA-binding protein	L	2707	611	3.41269e-06
rpsF	SSU1630	30S ribosomal protein S6	J	180	45	3.06696e-07
-	SSU1633	membrane protein	NC	163	25	1.15699e-29
-	SSU1638	membrane protein	S	90	11	2.11698e-23
rbfA	SSU1641	ribosome-binding factor A	J	338	126	0.00190001
-	SSU1643	hypothetical protein	J	181	76	0.00408366
-	SSU1648	phosphotransferase enzyme family protein	M	329	119	5.67415e-05
oppC	SSU1660	oligopeptide ABC transporter permease OppC	E	121	273	0.000174566
oppB	SSU1661	oligopeptide ABC transporter permease OppB	E	101	205	0.00136916
oppF	SSU1662	oligopeptide transport ATP-binding protein OppF	R	109	221	0.00128998
oppA	SSU1664	oligopeptide-binding protein OppA precursor	E	161	2635	4.03332e-189
-	SSU1665	D-alanyl-D-alanine carboxypeptidase	M	13	42	8.93479e-06
-	SSU1675	glutamine ABC transporter, glutamine-binding protein/permease protein	E	113	353	3.58924e-06
glnQ2	SSU1676	glutamine ABC transporter ATP-binding protein 2	E	49	136	1.10607e-05
-	SSU1678	membrane protein	O	92	1683	0
ilvA	SSU1679	threonine dehydratase	E	156	2580	1.06761e-299
ilvC	SSU1680	ketol-acid reductoisomerase	E	84	1821	0
ilvH	SSU1681	acetolactate synthase 3 regulatory subunit	E	23	540	0
alsS	SSU1682	acetolactate synthase catalytic subunit	E	43	864	0
ilvD	SSU1686	dihydroxy-acid dehydratase	E	88	214	0.000855519
-	SSU1687	hypothetical protein	NC	45	192	2.95469e-12
rpsI	SSU1691	30S ribosomal protein S9	J	464	172	0.000129565
-	SSU1698	membrane protein	NC	64	1	0
-	SSU1707	extracellular solute-binding protein	G	1	47	0
-	SSU1716	hypothetical protein	S	375	48	2.49338e-50
cysS	SSU1717	cysteinyl-tRNA synthetase	J	298	52	5.09266e-26
-	SSU1718	membrane protein	NC	29	6	1.58427e-06
-	SSU1719	phosphorylase family protein	F	43	11	4.20308e-05
cysE	SSU1720	serine acetyltransferase	E	90	24	6.74565e-07
pnpA	SSU1721	polynucleotide phosphorylase	J	93	31	1.05646e-05
rpsO	SSU1728	30S ribosomal protein S15	J	745	288	0.00091879
pyrP	SSU1729	uracil permease	F	25	5	3.02119e-07
-	SSU1732	ribosomal small subunit pseudouridine synthase B	J	38	8	1.67499e-05
-	SSU1733	acetyltransferase (GNAT) family protein	R	98	14	8.53707e-15
-	SSU1735	Major Facilitator Superfamily protein	NC	95	31	0.000102226
-	SSU1737	hypothetical protein	J	4	150	0
leuD	SSU1738	isopropylmalate isomerase small subunit	E	18	442	0
leuC	SSU1739	3-isopropylmalate dehydratase large subunit	E	10	420	0
leuB	SSU1740	3-isopropylmalate dehydrogenase	C	9	374	0
leuA	SSU1741	2-isopropylmalate synthase	E	7	283	0
-	SSU1747	DhaKLM operon coactivator DhaQ	G	34	12	0.00453717
purA	SSU1758	adenylosuccinate synthetase	F	105	38	0.000891472
ssnA	SSU1760	surface-anchored DNA nuclease	R	38	464	4.34113e-187
-	SSU1763	MutT/NUDIX hydrolase family protein	F	185	5011	0
-	SSU1764	nicotinamide mononucleotide transporter	H	115	3209	0
-	SSU1765	transcriptional regulator	H	108	2476	0
-	SSU1768	hypothetical protein	NC	106	313	1.0994e-06
-	SSU1769	hypothetical protein	NC	26	67	0.00038172
-	SSU1773	surface-anchored serine protease	O	68	1899	0
nusG	SSU1774	transcription antitermination protein NusG	K	247	65	3.80256e-08
rpmG	SSU1776	50S ribosomal protein L33	J	1063	279	6.72944e-08
-	SSU1791	sulfatase	M	71	9	8.12016e-53
-	SSU1809	membrane protein	NC	5	223	0
sms	SSU1821	DNA repair protein RadA	O	152	24	5.19719e-27
-	SSU1822	phosphoglycerate mutase family protein	G	114	13	8.45465e-29
dut	SSU1823	deoxyuridine 5'-triphosphate nucleotidohydrolase	F	85	13	4.08941e-12
-	SSU1829	rhomboid family membrane protein	R	130	33	1.21464e-10
-	SSU1830	5-formyltetrahydrofolate cyclo-ligase	H	852	167	1.55572e-19
-	SSU1831	peptidase	R	33	198	3.62209e-36
dapD	SSU1832	2,3,4,5-tetrahydropyridine-2,6-dicarboxylate N-succinyltransferase	E	65	408	4.16468e-46
-	SSU1841	transcriptional antiterminator	K	26	9	0.00081086
-	SSU1849	surface-anchored amylopullulanase	G	7	25	1.69181e-11
glnQ5	SSU1851	glutamine transporter, ATP-binding protein 5	E	87	1	0
-	SSU1852	amino acid ABC transporter permease	E	66	1	0
-	SSU1853	amino acid ABC transporter substrate-binding protein	E	288	9	0
-	SSU1854	amidase	R	32	5	7.68535e-08
pepO	SSU1864	endopeptidase O	O	240	705	0.000625838
-	SSU1868	membrane protein	NC	463	2384	3.00164e-27
-	SSU1869	extracellular metal cation-binding protein	P	280	1800	1.27538e-26
-	SSU1879	bifunctional 2',3'-cyclic nucleotide 2'-phosphodiesterase/3'-nucleotidase precursor protein	F	50	169	4.95617e-09
prmA	SSU1894	ribosomal protein L11 methyltransferase	J	57	17	8.82952e-06
nrdG	SSU1899	anaerobic ribonucleoside-triphosphate reductase activating protein	O	62	18	0.000342795
-	SSU1900	acetyltransferase (GNAT) family protein	R	66	20	0.000889959
-	SSU1901	nucleotidase	F	123	35	1.16448e-06
nrdD	SSU1903	anaerobic ribonucleoside triphosphate reductase	F	182	60	0.000569071
argS	SSU1910	arginyl-tRNA synthetase	J	372	950	0.0013576
malX	SSU1915g	maltose/maltodextrin-binding protein precursor	G	211	555	0.00151571
-	SSU1926	glycosyl transferase	M	76	27	0.000159603
rpsD	SSU1935	30S ribosomal protein S4	J	1001	175	3.55809e-24
-	SSU1936	hypothetical protein	NC	2080	366	4.88562e-24
mnmA	SSU1947	tRNA-specific 2-thiouridylase MnmA	J	294	99	5.68065e-05
-	SSU1951	cobalt transport protein	P	213	94	0.00763395
recF	SSU1959	recombination protein F	L	28	4	1.04478e-10
aexpression level = 0 indicates a very low q-value that lies under the measurement limit

## Sheet: Figure S1
Supplementary Figure S1. Differentially expressed genes clustered in orthologous groups (COG). Differentially expressed genes are classified into 20 functional categories (G: carbohydrate metabolism and transport; C: energy production and conversion; NC: not classified; E: amino acid metabolism and transport; S: function unknown; K: transcription; general functional prediction only; I: lipid meta…
